# Supplementary material for: The design of phase change materials with carbon aerogel composites for multi-responsive thermal energy capture and storage
Source: Royal Society of Chemistry journal article supplement (doi:10.1039/d0ta09035b), 2020-12-10
Supplement: d0ta09035b1.pdf [file d0ta09035b1.pdf]

## Supporting information

### **Design of phase change materials with carbon aerogel composite for multi-responsive thermal energy capture and storage**

Keyan Sun,<sup>a,d</sup> Yan Kou,<sup>a</sup> Hongsheng Dong,<sup>a</sup> Sheng Ye,<sup>b</sup> Donghui Zhao,<sup>e</sup>  
Jian Liu,<sup>\*b,c</sup> Quan Shi <sup>\*a</sup>

<sup>a</sup> Thermochemistry Laboratory, Liaoning Province Key Laboratory of Thermochemistry for Energy and Materials, Dalian National Laboratory for Clean Energy, Dalian Institute of Chemical Physics, Chinese Academy of Sciences, Dalian 116023, China.

<sup>b</sup> State Key Laboratory of Catalysis, Dalian Institute of Chemical Physics, Chinese Academy of Sciences, 457 Zhongshan Road, Dalian 116023, China.

<sup>c</sup> DICP-Surrey Joint Centre for Future Materials, Department of Chemical and Process Engineering and Advanced Technology Institute, University of Surrey, Guildford, Surrey, GU2 7XH, UK.

<sup>d</sup> University of Chinese Academy of Sciences, Beijing 100049, China

<sup>e</sup> Dalian Jiaotong University, School of Art and Design, Dalian 116028, China

**\*Corresponding Author: [jian.liu@surrey.ac.uk](mailto:jian.liu@surrey.ac.uk)**

**[shiquan@dicp.ac.cn](mailto:shiquan@dicp.ac.cn)**

## **Characterization**

The morphology and structure were measured using a field-emission scanning electron microscopy (SEM, QUANTA 450) and transmission electron microscopy (TEM, JEM-2100, Japan). The pore properties and Brunauer–Emmett–Teller (BET) surface area were determined by nitrogen adsorption-desorption isotherm instrument (TriStar II 3020), and the pore-size distribution was calculated based on the DFT model. X-ray photoelectron spectroscopy (XPS, Escalab 250xi) was used to define the compositions and binding energy. Raman spectroscopy (Nano Wizard Ultra Speed & in Via Raman, German) was conducted to evaluate the graphitization degree of FCA with the excitation laser excitation of 532 nm. The chemical composition of PFC CPCMs was investigated using a fourier transform infrared (FTIR) spectrometer (Nicolet iS50) in the form of KBr discs over the range of 400-4000  $\text{cm}^{-1}$  and X-ray diffractometer (XRD).

The phase change properties were investigated by means of a differential scanning calorimeter (Discovery DSC, TA, America) under nitrogen atmosphere. In the DSC measurements, the samples were heated from 40 °C to 100 °C and held at 100 °C for 3 min to erase the thermal history of the sample, following by cooling to -20 °C and then heated to 100 °C with a scanning rate of 10 °C/min, and the second run was employed to analyze the phase change properties. The thermal stability was

determined using a thermogravimetric analyzer (TG, SETSYS 16/18, SETARAM, France) from room temperature to 600 °C with a heating rate of 10 °C/min under nitrogen atmosphere. The thermal conductivity measurement with an uncertainty of  $\pm (2-5) \%$  was performed on a thermal constants analyzer (Hot Disk TPS2500S) at room temperature. The thermal cycle stability was evaluated by 1000 heating-cooling cycles using a self-developed device. The magnetic property (M–H curve) was measured with a Quantum Design Physical Property Measurement System (PPMS-9, USA). The optical properties were studied using an ultraviolet–visible–near-infrared (UV–vis–NIR) spectrophotometer (Lambda 950, USA).

The solar-thermal conversion experiments were examined under a simulated sunlight provided by a xenon lamp source (Beijing Bofeilai Technology Co., Ltd, China), where the distance between sample and light source was set to be about 20 cm. The temperature was measured by a thermocouple and the data was collected by a data acquisition/ switch unit. The electro-thermal conversion property was tested by a direct current power supply. The temperature was measured by a thermocouple and the data was collected by a data acquisition unit. The magnetic-thermal conversion process was evaluated under an alternating magnetic field generated by an alternating current generator, and the temperature of the sample was detected using a fiber sensor. The infrared imaging photos

were taken by an infrared thermal imager (Fluke Ti400)

Table S1. Synthesis condition of different FCA and FCA CPCMs samples.

| FCA samples | Gelatin (g) | Fe(NO <sub>3</sub> ) <sub>3</sub> ·9H <sub>2</sub> O (g) | FCA CPCMs |
|-------------|-------------|----------------------------------------------------------|-----------|
| FCA0        | 2           | 0                                                        | FCA0-C20  |
| FCA1        | 2           | 1                                                        | FCA1-C20  |
| FCA2        | 2           | 2                                                        | FCA2-C20  |
| FCA3        | 2           | 3                                                        | FCA3-C20  |

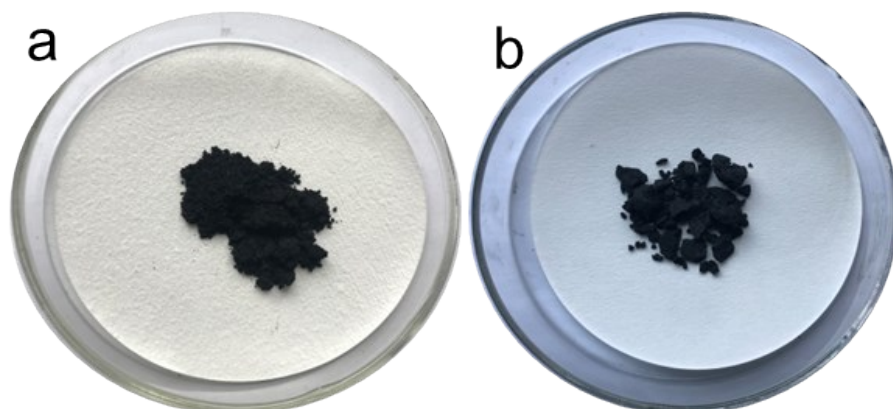

Figure S1. Photographs of (a) FCA and (b) FCA CPCMs.

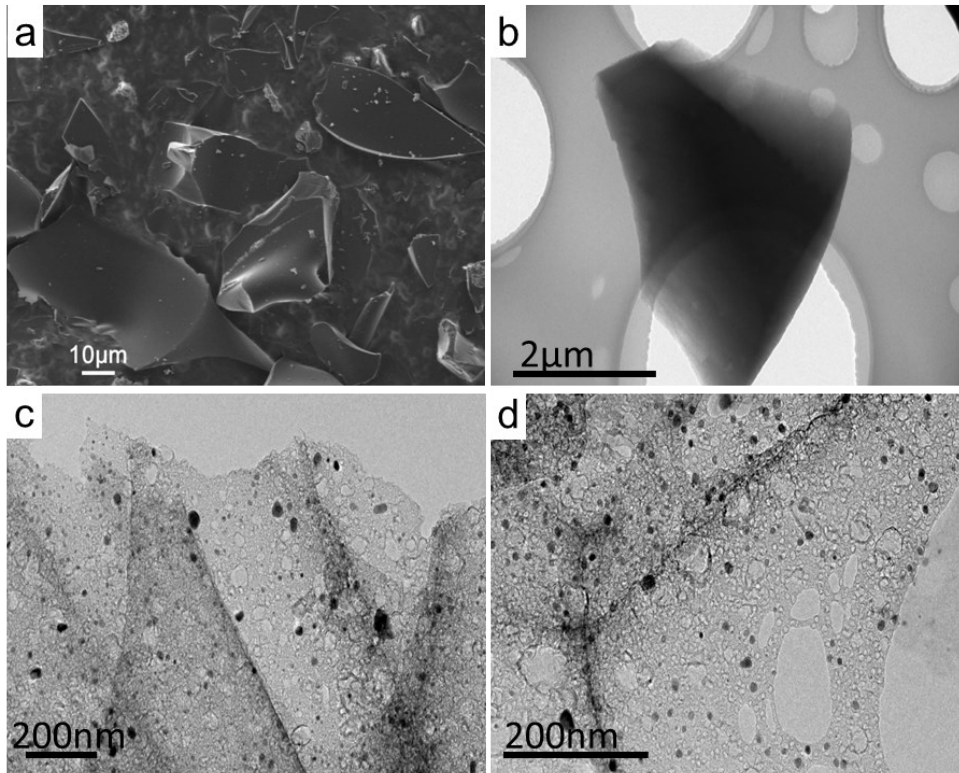

Figure S2. (a) SEM image of FCA0, (b) TEM images of FCA0 and (c, d) FCA2.

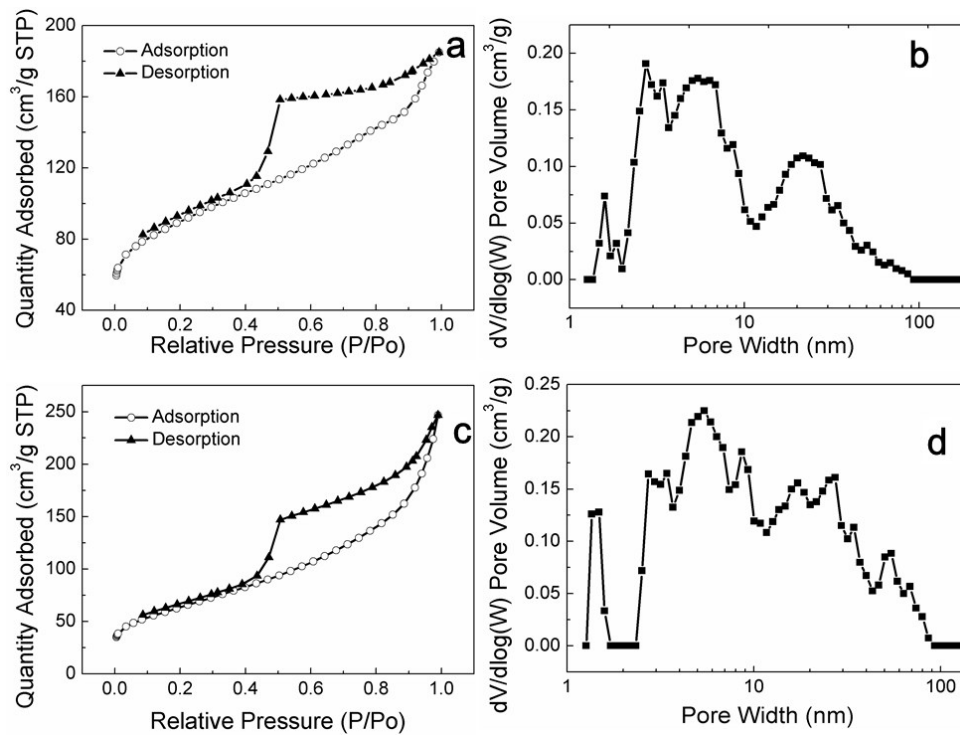

Figure S3. N<sub>2</sub> adsorption and desorption isotherms and corresponding pore size distributions of (a, b) FCA1 and (c, d) FCA3.

Table S2. N<sub>2</sub> adsorption and desorption data of FCA samples.

| Sample | Surface area (m <sup>2</sup> /g) | Average pore size (nm) |
|--------|----------------------------------|------------------------|
| FCA1   | 301.63                           | 4.31                   |
| FCA2   | 248.37                           | 5.83                   |
| FCA3   | 228.35                           | 6.61                   |

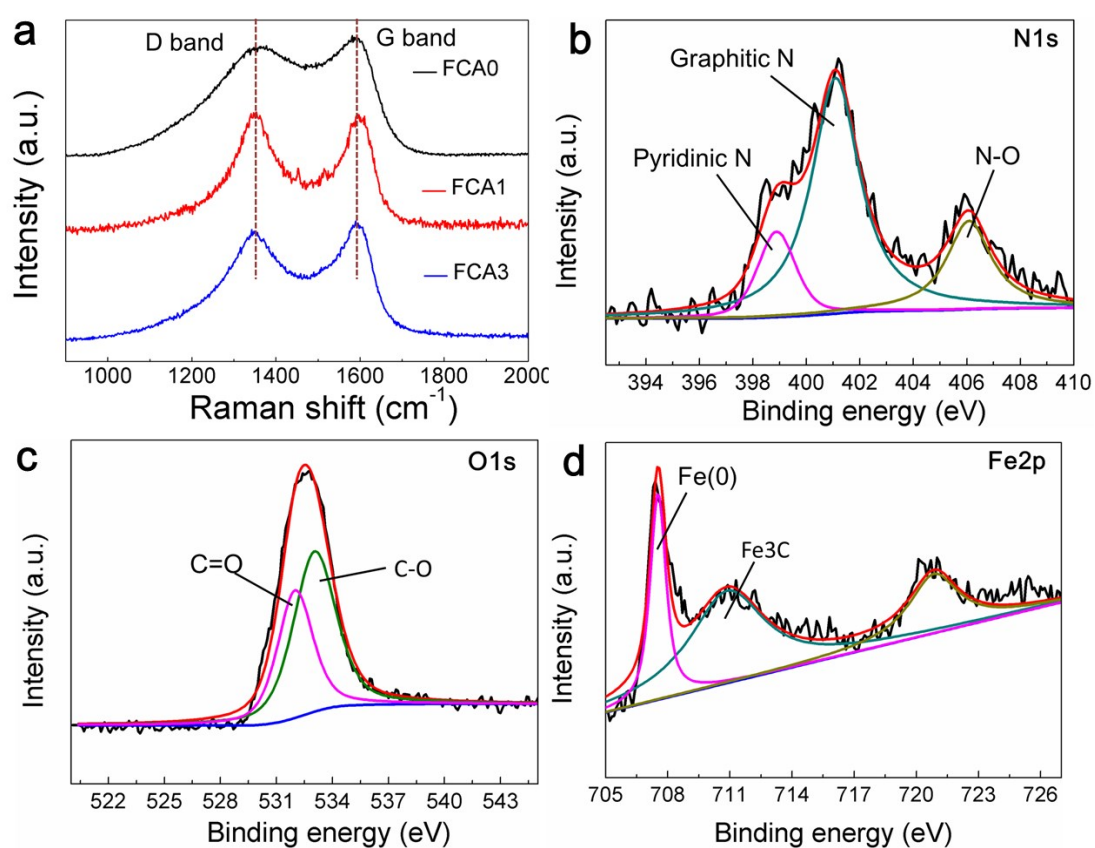

Figure S4. (a) Raman spectra of FCA0, FCA1 and FCA3, (b) N1s, (c) O1s and (d) Fe2p spectra of FCA2.

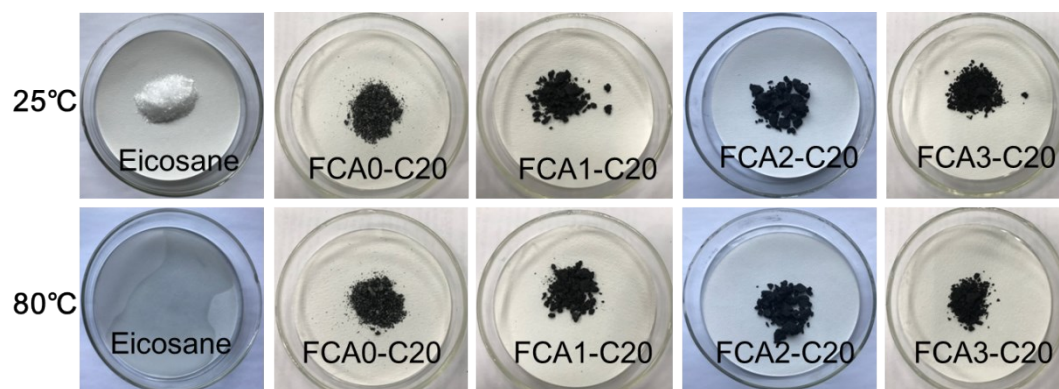

Figure S5. Leakage test photographs for eicosane, FCA0-C20, FCA1-C20, FCA2-C20 and FCA3-C20 sample.

Table S3. TG data of eicosane and FCA CPCMs samples.

| Sample   | T <sub>Onset</sub> (°C) | Weight loss (%) | Eicosane ratio (%) |
|----------|-------------------------|-----------------|--------------------|
| FCA0-C20 | 221.17                  | 15.96           | 16.64              |
| FCA1-C20 | 242.21                  | 57.01           | 59.42              |
| FCA2-C20 | 265.49                  | 82.32           | 85.80              |
| FCA3-C20 | 265.82                  | 82.19           | 85.67              |
| Eicosane | 275.39                  | 95.94           | 100                |

In the Table S3, T<sub>Onset</sub> presents the decomposition temperature of sample.

The eicosane ratio was determined by the following equation:

$$\text{Eicosane ratio (\%)} = \text{Weight loss (\%)} / 95.94\%$$

Table S4. DSC data of eicosane and FCA CPCMs samples.

| Sample   | Melting   |                       | Crystallization |                       | R(%)  | E(%)  |
|----------|-----------|-----------------------|-----------------|-----------------------|-------|-------|
|          | progress  |                       | process         |                       |       |       |
|          | Onset(°C) | $\Delta H_m$<br>(J/g) | Onset(°C)       | $\Delta H_c$<br>(J/g) |       |       |
| FCA0-C20 | 35.32     | 52.86                 | 34.34           | 52.34                 | 20.98 | 20.99 |
| FCA1-C20 | 35.18     | 150.05                | 34.42           | 148.99                | 59.57 | 59.66 |
| FCA2-C20 | 35.03     | 211.66                | 34.36           | 209.80                | 84.03 | 84.09 |
| FCA3-C20 | 35.27     | 210.93                | 34.09           | 208.63                | 83.74 | 83.71 |
| Eicosane | 35.80     | 251.89                | 33.93           | 249.31                | 100   | 100   |

To further determine the thermal energy storage property of FCA CPCMs samples, following equations were employed and the calculated results are list in Table S4:

$$R = \frac{\Delta H_{m,CPCM}}{\Delta H_{m,PCM}} \times 100\% \quad (1)$$

$$E = \frac{\Delta H_{m,CPCM} + \Delta H_{c,CPCM}}{\Delta H_{m,PCM} + \Delta H_{c,PCM}} \times 100\% \quad (2)$$

In the above equations,  $R$  and  $E$  represent the encapsulation ratio and encapsulation efficiency, and  $\Delta H_{m,CPCM}$ ,  $\Delta H_{c,CPCM}$ ,  $\Delta H_{m,PCM}$  and  $\Delta H_{c,PCM}$  are phase change enthalpy of FCA CPCMs and eicosane samples in melting and crystallization process, respectively.



Table S5. Thermal cycle stability data of FCA2-C20 sample.

| Cycle times       | Melting progress |                    | Crystallization process |                    |
|-------------------|------------------|--------------------|-------------------------|--------------------|
|                   | Onset(°C)        | $\Delta H_m$ (J/g) | Onset(°C)               | $\Delta H_c$ (J/g) |
| FCA2-C20          | 35.01            | 212.35             | 34.28                   | 211.82             |
| After 200 cycles  | 34.91            | 209.64             | 34.25                   | 209.02             |
| After 400 cycles  | 34.78            | 212.84             | 34.32                   | 211.64             |
| After 600 cycles  | 34.99            | 206.05             | 34.16                   | 205.60             |
| After 800 cycles  | 35.02            | 205.04             | 34.20                   | 204.84             |
| After 1000 cycles | 35.00            | 205.23             | 34.13                   | 204.67             |

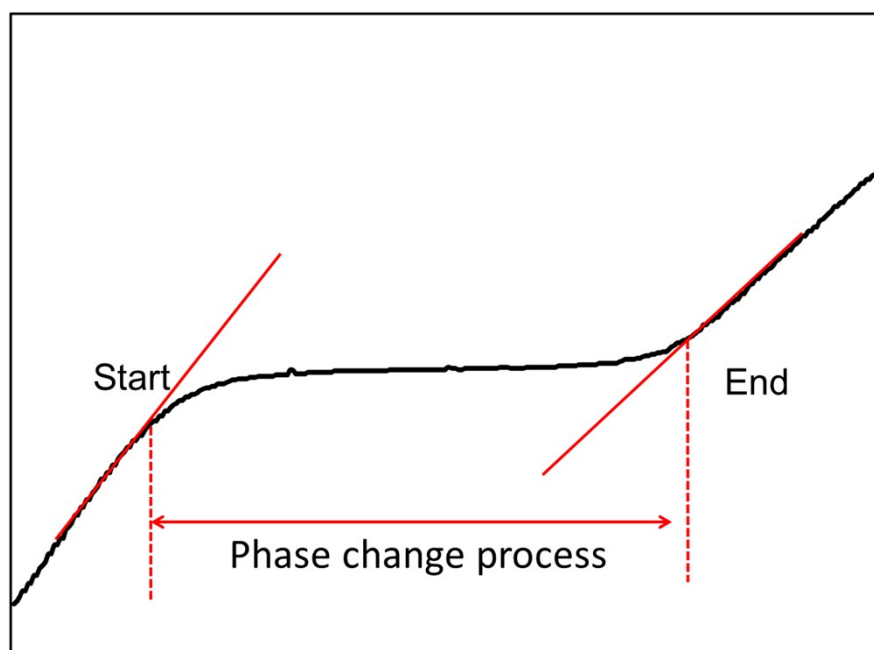

Figure S6. The schematic of tangential method.

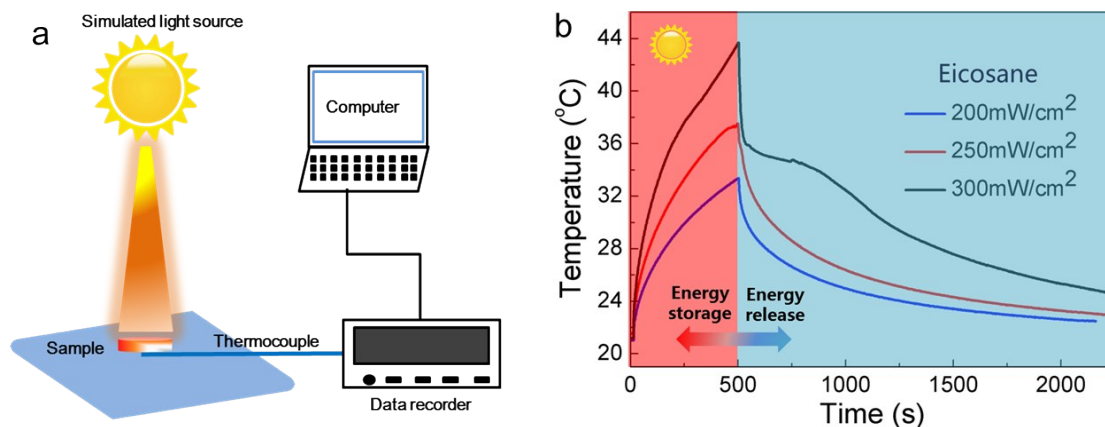

Figure S7. (a) The schematic of solar-thermal conversion device diagram, (b) solar-thermal conversion curves of eicosane.

Table S6. Solar-thermal conversion data of FCA2-C20 sample.

| Sample                                  | FCA2-C20     |       |        |
|-----------------------------------------|--------------|-------|--------|
| Sample mass(g)                          | 0.56         |       |        |
| Sample area (cm <sup>2</sup> )          | 4.06         |       |        |
| Temperature (°C)                        | 27-34        |       |        |
| $C_p$ (J/(g.°C))                        | 1.66(30.5°C) |       |        |
| $P$ (mW/cm <sup>2</sup> )               | 200          | 250   | 300    |
| Start time (s)                          | 64           | 44    | 34     |
| End time (s)                            | 318          | 204   | 144    |
| $\Delta t$ (s)                          | 254          | 160   | 110    |
| Input energy <sup>a</sup> (J)           | 206.25       | 162.4 | 133.98 |
| Thermal energy storage <sup>b</sup> (J) | 125.04       |       |        |
| $\eta$ (%)                              | 60.63        | 77.00 | 93.32  |

<sup>a</sup>Input energy =  $P * s * \Delta t$     <sup>b</sup>Thermal energy storage =  $m * (\Delta H + Q)$

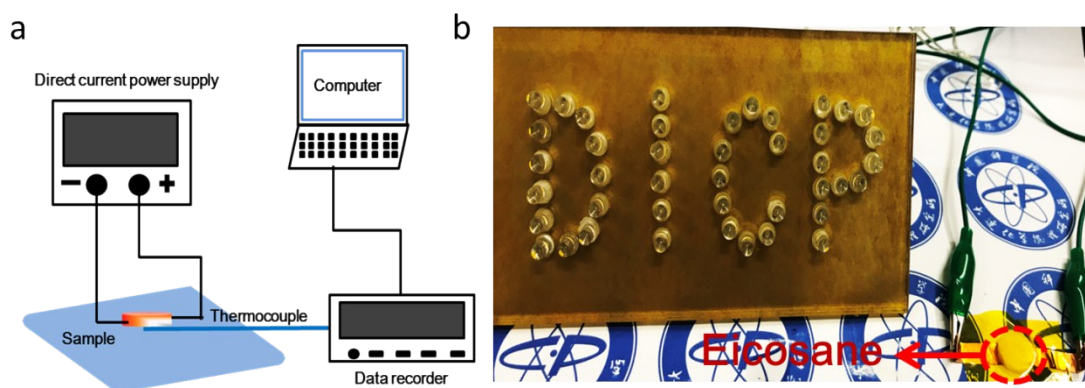

Figure S8. (a) The schematic of electro-thermal conversion device diagram. (b) LED lights of “DICP” symbols with eicosane sample.

Table S7. Electro-thermal conversion data of FCA2-C20 sample.

| Sample                                  | FCA2-C20     |        |        |
|-----------------------------------------|--------------|--------|--------|
| Sample mass(g)                          | 0.56         |        |        |
| Temperature (°C)                        | 24-39        |        |        |
| $C_p$ (J/(g·°C))                        | 1.78(31.5°C) |        |        |
| $I$ (A)                                 | 0.12         | 0.15   | 0.20   |
| Start time (s)                          | 38           | 24     | 20     |
| End time (s)                            | 150          | 84     | 50     |
| $\Delta t$ (s)                          | 112          | 60     | 30     |
| Input energy <sup>a</sup> (J)           | 278.70       | 190.40 | 140.75 |
| Thermal energy storage <sup>b</sup> (J) | 133.48       |        |        |
| $\eta$ (%)                              | 47.89        | 70.11  | 94.83  |

<sup>a</sup>Input energy =  $U * I * \Delta t$  <sup>b</sup>Thermal energy storage =  $m * (\Delta H + Q)$

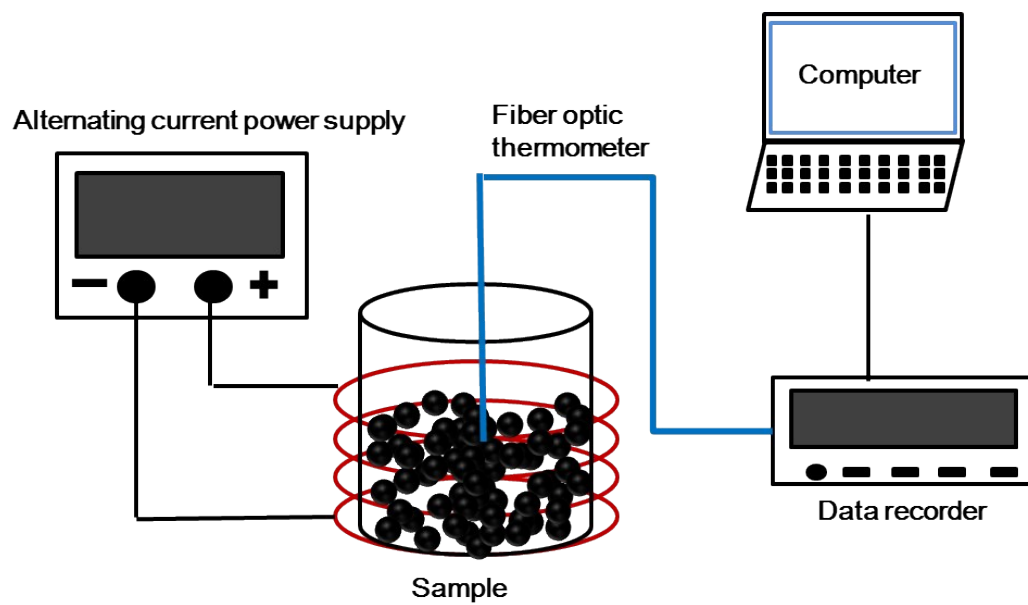

Figure S9. The schematic of magnetic-thermal conversion device diagram
